# Supplementary material for: Coordination tailoring of Cu single sites on C3N4 realizes selective CO2 hydrogenation at low temperature
Source: PubMed Central journal article supplement (PMC8519910; doi:10.1038/s41467-021-26316-6), 2021-10-15
Supplement: 41467_2021_26316_MOESM1_ESM.pdf [file 41467_2021_26316_MOESM1_ESM.pdf]

# Supplementary information

## Coordination Tailoring of Cu Single Sites on C<sub>3</sub>N<sub>4</sub>

### Realizes Selective CO<sub>2</sub> Hydrogenation at Low Temperature

Tang Yang<sup>1</sup>, Xinnan Mao<sup>2,3</sup>, Ying Zhang<sup>1</sup>, Xiaoping Wu<sup>3</sup>, Lu Wang<sup>2,\*</sup>, Mingyu Chu<sup>2,3</sup>, Chih-Wen Pao<sup>4</sup>, Shize Yang<sup>5</sup>, Yong Xu<sup>3,\*</sup> and Xiaoqing Huang<sup>1,\*</sup>

<sup>1</sup>State Key Laboratory of Physical Chemistry of Solid Surfaces, College of Chemistry and Chemical Engineering, Xiamen University, Xiamen, 361005, China.

<sup>2</sup>Institute of Functional Nano & Soft Materials (FUNSOM), Jiangsu Key Laboratory for Carbon-Based Functional Materials & Devices, Soochow University, Suzhou, 215123, China.

<sup>3</sup>Guangzhou Key Laboratory of Low-Dimensional Materials and Energy Storage Devices, Collaborative Innovation Center of Advanced Energy Materials, School of Materials and Energy, Guangdong University of Technology, Guangzhou, 510006, China.

<sup>4</sup>National Synchrotron Radiation Research Center, Hsinchu, 30076, Taiwan.

<sup>5</sup>Eyring Materials Center, Arizona State University, Tempe, Arizona, 85287, USA.

E-mail: lwang@suda.edu.cn, yongxu@gdut.edu.cn, hxq006@xmu.edu.cn

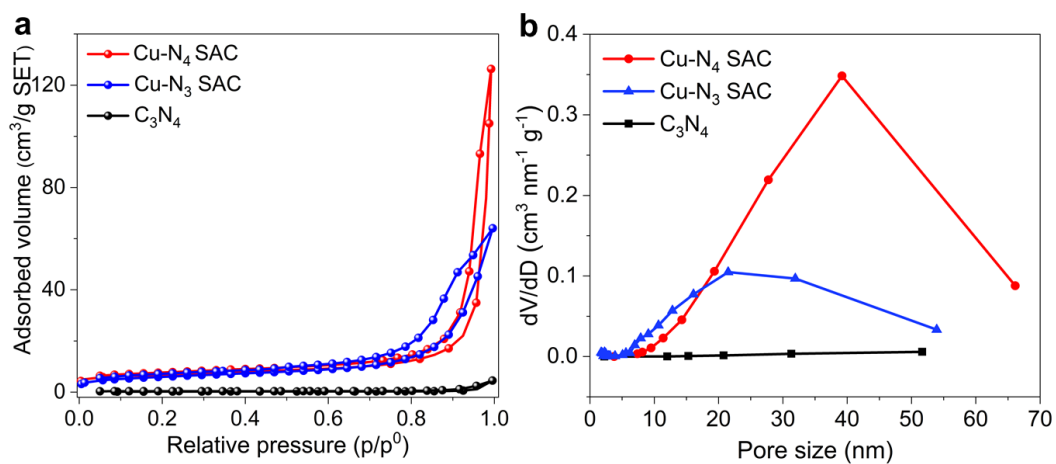

**Supplementary Figure 1 | Physicochemical properties of various catalysts.** (a) N<sub>2</sub> sorption isotherms and (b) pore size analysis of Cu-N<sub>4</sub> SAC, Cu-N<sub>3</sub> SAC and C<sub>3</sub>N<sub>4</sub>. Source data are provided as a Source Data file.

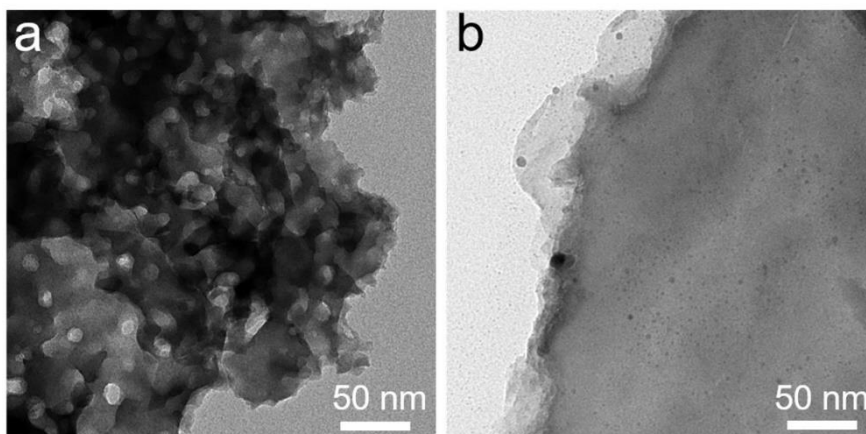

**Supplementary Figure 2 | Characterizations of various samples.** TEM images of (a) C<sub>3</sub>N<sub>4</sub> and (b) Cu NPs/C<sub>3</sub>N<sub>4</sub>. Cu nanoparticles are labeled in (b).

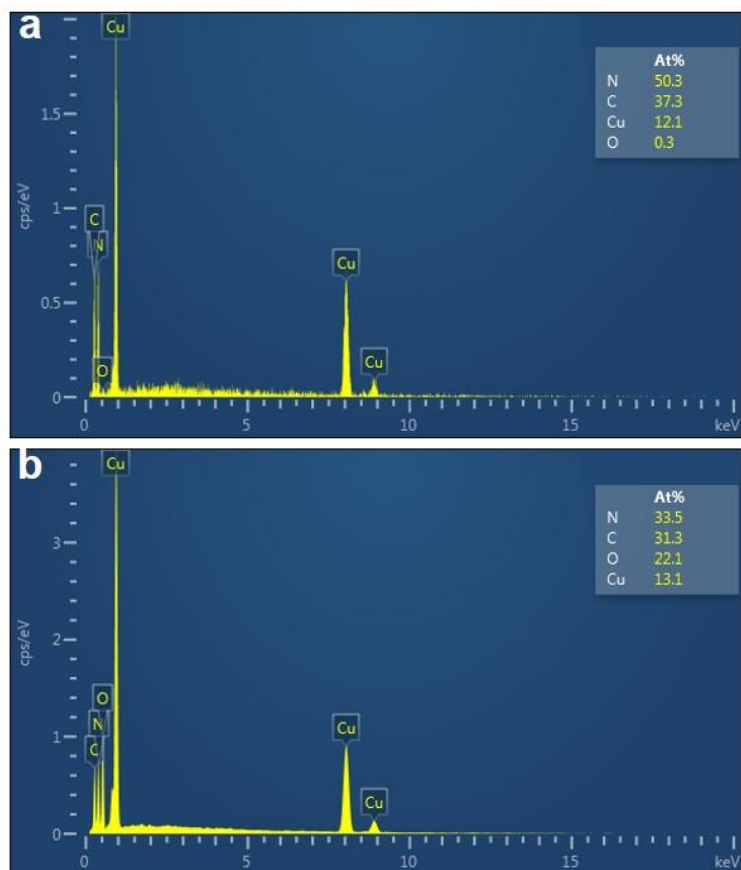

**Supplementary Figure 3 | Characterizations of SACs.** EDX spectrum of (a) Cu-N<sub>4</sub> SAC and (b) Cu-N<sub>3</sub> SAC.

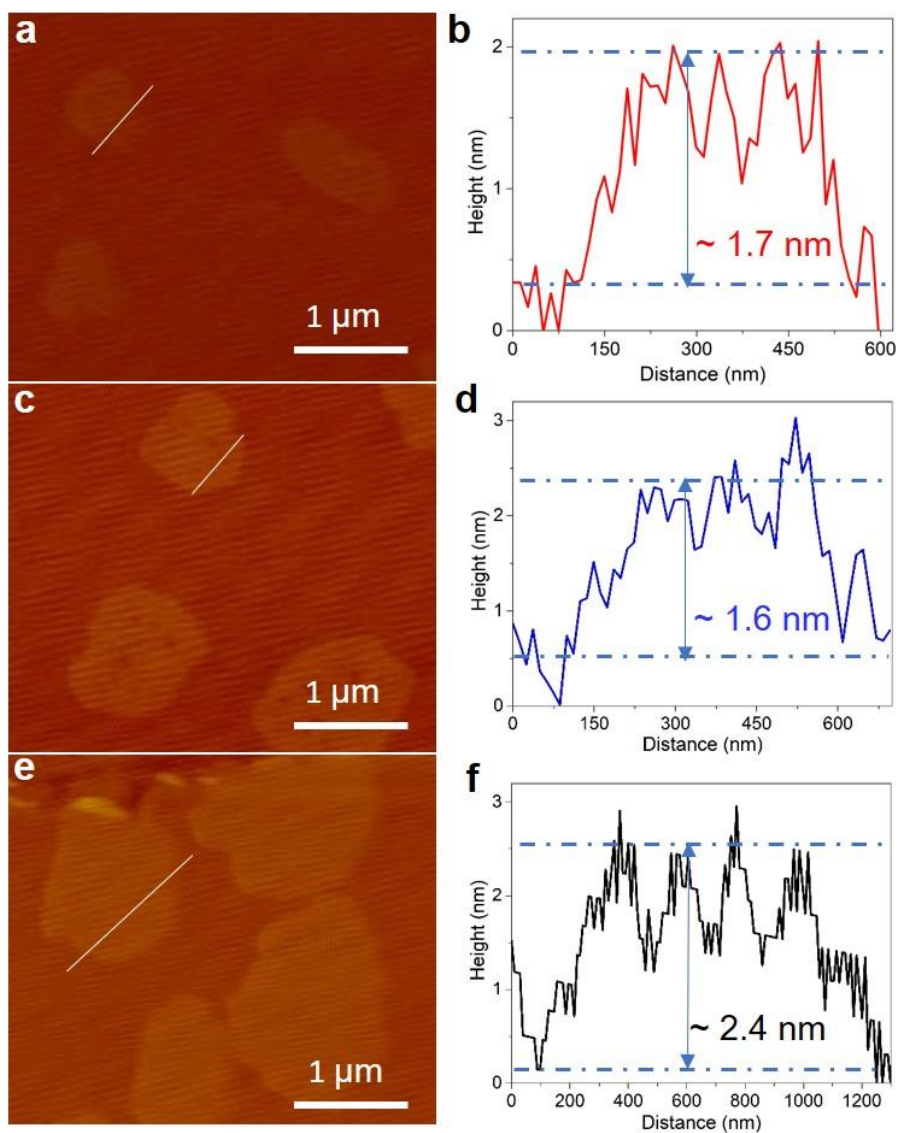

**Supplementary Figure 4 | Thickness measurements of various catalysts.** (a, c, e) AFM images and (b, d, f) height profiles of (a, b) Cu-N<sub>4</sub> SAC, (c, d) Cu-N<sub>3</sub> SAC and (e, f) C<sub>3</sub>N<sub>4</sub>. Source data are provided as a Source Data file.

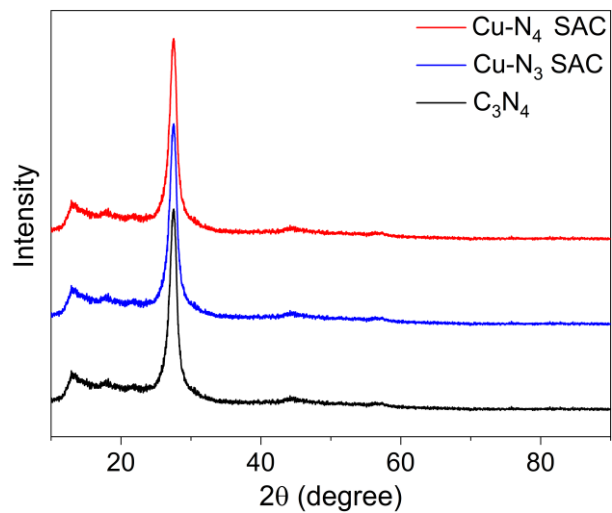

**Supplementary Figure 5 | Characterizations of various catalysts.** XRD patterns of Cu-N<sub>4</sub> SAC, Cu-N<sub>3</sub> SAC and C<sub>3</sub>N<sub>4</sub>. Source data are provided as a Source Data file.

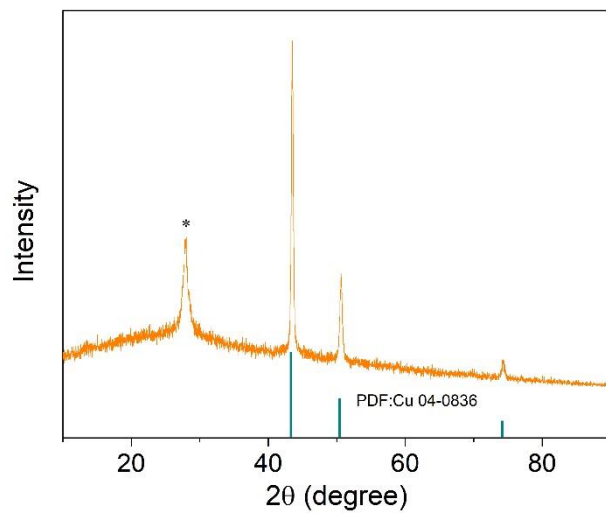

**Supplementary Figure 6 | XRD pattern of Cu NPs/C<sub>3</sub>N<sub>4</sub>.** “\*” represents the characteristic peak of C<sub>3</sub>N<sub>4</sub>. Source data are provided as a Source Data file.

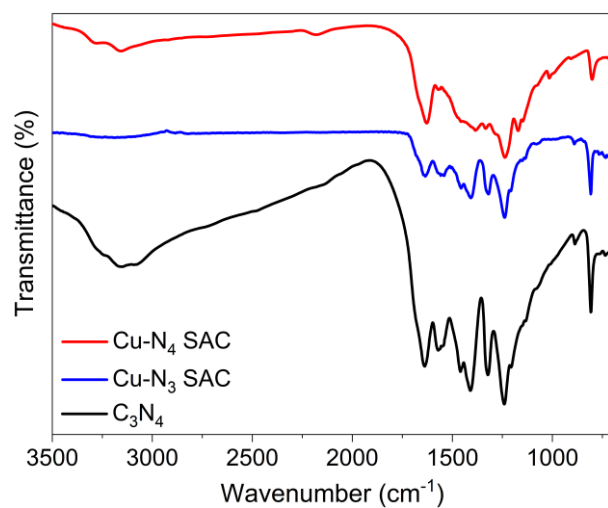

**Supplementary Figure 7 | Characterizations of various catalysts.** IR spectra of Cu-N<sub>4</sub> SAC, Cu-N<sub>3</sub> SAC and C<sub>3</sub>N<sub>4</sub>. Source data are provided as a Source Data file.



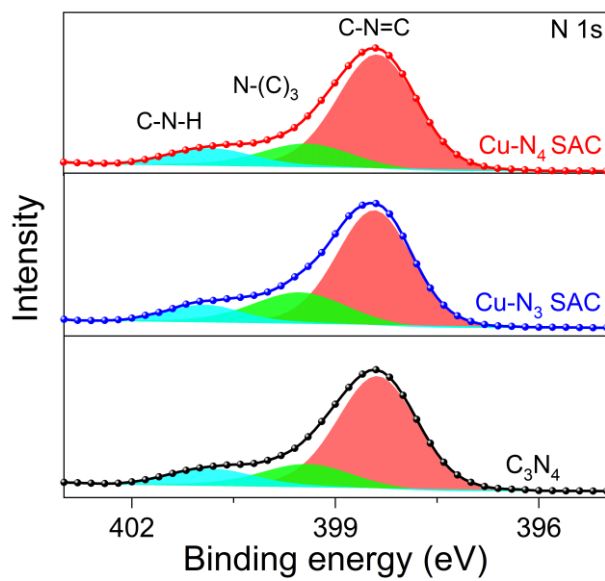

**Supplementary Figure 8 | XPS spectra of various catalysts.** N 1s XPS spectra of Cu-N<sub>4</sub> SAC, Cu-N<sub>3</sub> SAC and C<sub>3</sub>N<sub>4</sub>. Source data are provided as a Source Data file.

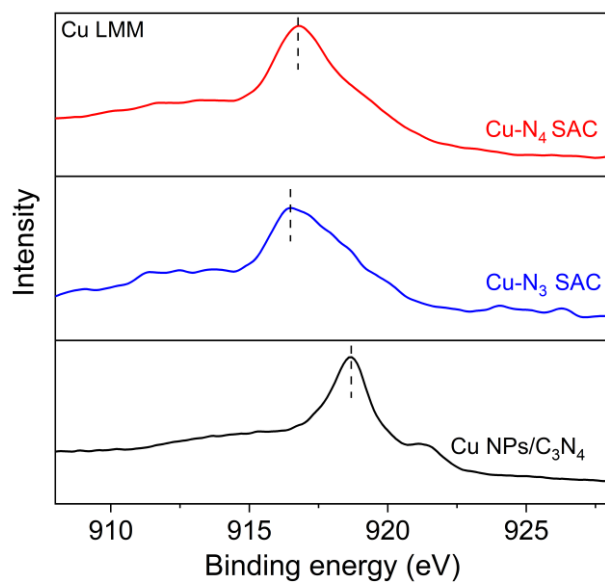

**Supplementary Figure 9 | Structural analysis of various catalysts.** Cu LMM of spectra of Cu-N<sub>4</sub> SAC, Cu-N<sub>3</sub> SAC and C<sub>3</sub>N<sub>4</sub>. Source data are provided as a Source Data file. Source data are provided as a Source Data file.

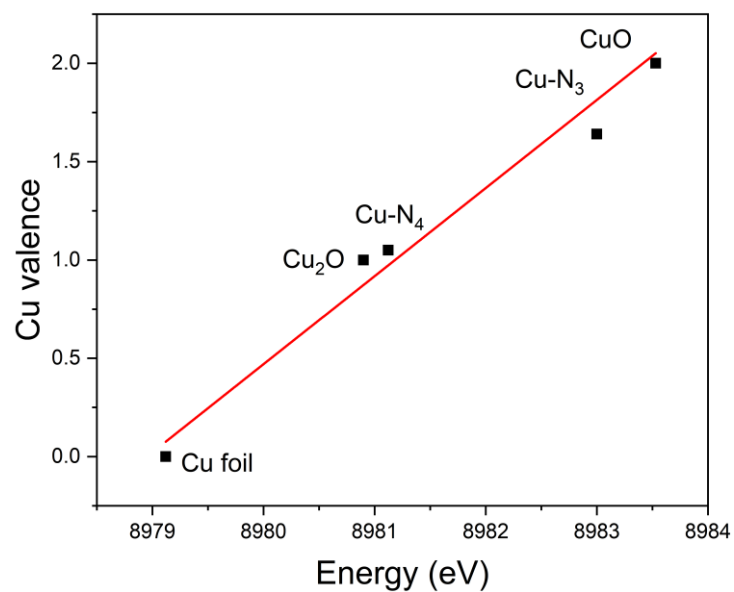

**Supplementary Fig. 10 | The mean chemical valences of Cu species in Cu-N<sub>3</sub> and Cu-N<sub>4</sub> SACs.**

The values are calculated based XANES spectra of catalysts and references of Cu foil, Cu<sub>2</sub>O and CuO. Source data are provided as a Source Data file.

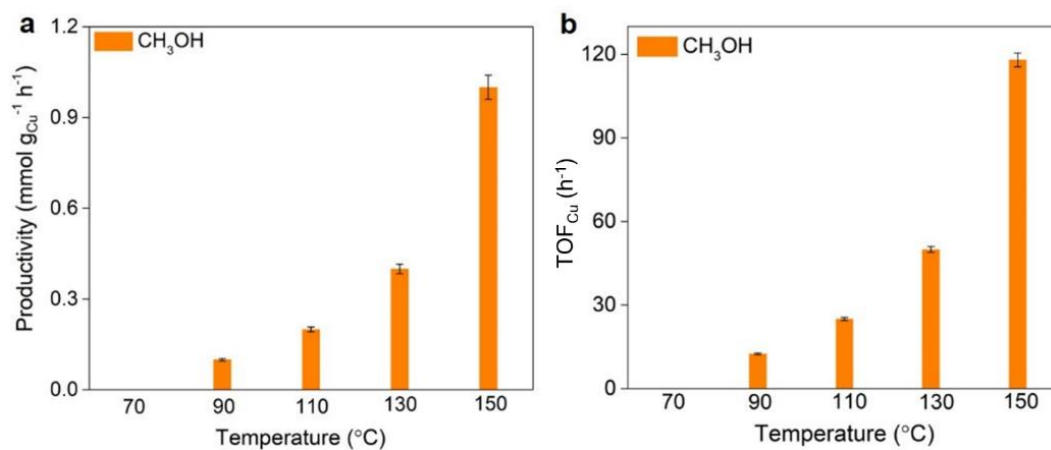

**Supplementary Figure 11 | Catalytic performance of CO<sub>2</sub> hydrogenation over Cu NPs/C<sub>3</sub>N<sub>4</sub>.**

(a) CH<sub>3</sub>OH productivities and (b) TOF values of Cu NPs/C<sub>3</sub>N<sub>4</sub> at different temperatures. The reactor was pressurized with CO<sub>2</sub>, H<sub>2</sub> and N<sub>2</sub> with a total pressure of 3.2 MPa (72:24:4 vol.%). All the data were collected for three times, and the error bars represent the standard deviation. Source data are provided as a Source Data file.

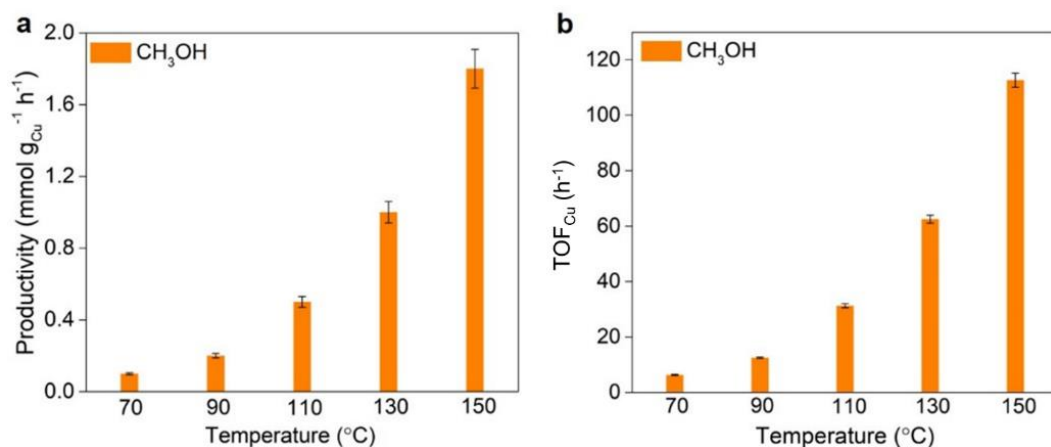

**Supplementary Figure 12 | Catalytic performance of CO<sub>2</sub> hydrogenation over Cu-ZnO/Al<sub>2</sub>O<sub>3</sub>.** (a) CH<sub>3</sub>OH productivities and (b) TOF values of Cu-ZnO/Al<sub>2</sub>O<sub>3</sub> at different temperatures. The reactor was pressurized with CO<sub>2</sub>, H<sub>2</sub> and N<sub>2</sub> with a total pressure of 3.2 MPa (72:24:4 vol.%). All the data were collected for three times, and the error bars represent the standard deviation. Source data are provided as a Source Data file.

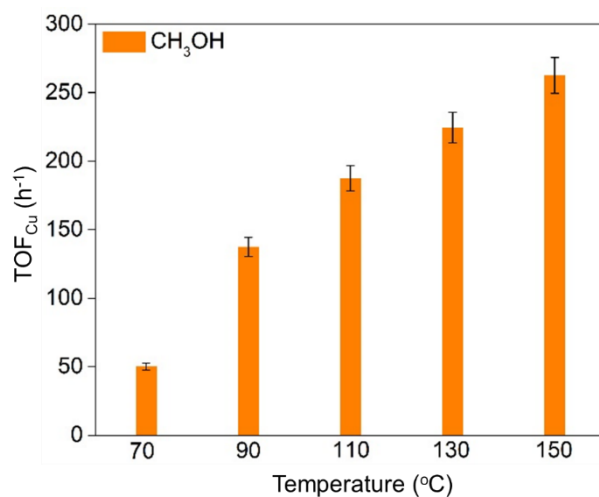

**Supplementary Figure 13 | Catalytic performance of CO<sub>2</sub> hydrogenation over Cu–N<sub>4</sub> SAC.** TOF values of CH<sub>3</sub>OH for Cu–N<sub>4</sub> SAC in a temperature range of 70–150 °C. The reactor was pressurized with CO<sub>2</sub>, H<sub>2</sub> and N<sub>2</sub> with a total pressure of 3.2 MPa (72:24:4 vol.%). All the data were collected for three times, and the error bars represent the standard deviation. Source data are provided as a Source Data file.

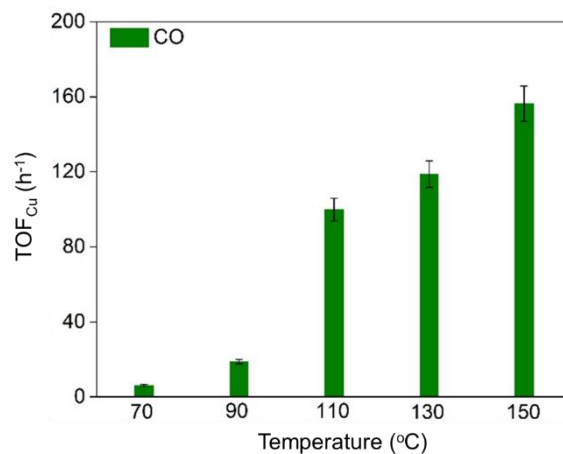

**Supplementary Figure 14 | Catalytic performance of CO<sub>2</sub> hydrogenation over Cu-N<sub>3</sub> SAC.** TOF values of CO for Cu-N<sub>3</sub> SAC in a temperature range of 70–150 °C. The reactor was pressurized with CO<sub>2</sub>, H<sub>2</sub> and N<sub>2</sub> with a total pressure of 3.2 MPa (72:24:4 vol.%). All the data were collected for three times, and the error bars represent the standard deviation. Source data are provided as a Source Data file.

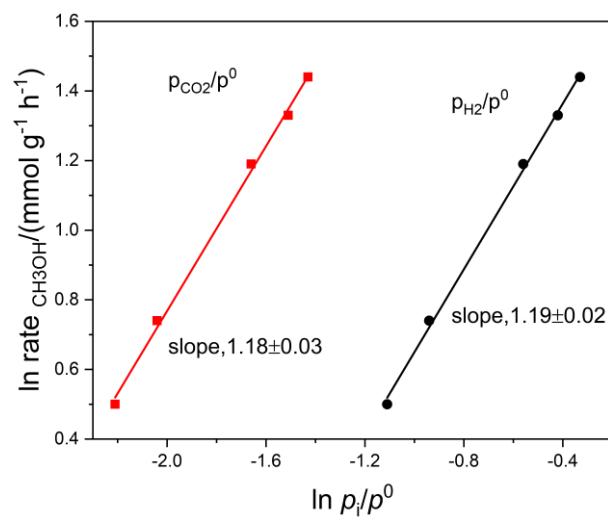

**Supplementary Figure 15 | The reaction orders with respect to  $CO_2$  and  $H_2$  for Cu- $N_4$  SAC.** Data were collected at 150 °C and a total pressure of 3.2 MPa with a fixed  $CO_2/H_2$  ratio of 3. Source data are provided as a Source Data file.



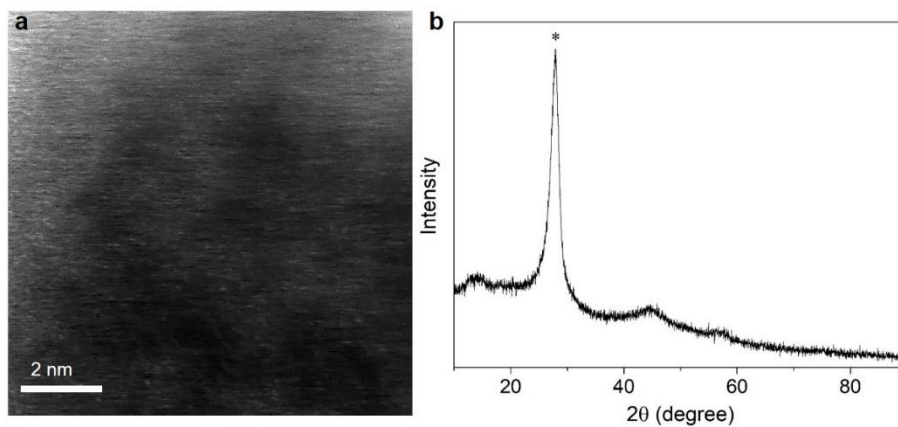

**Supplementary Figure 16 | Characterizations of the spent Cu-N<sub>4</sub> SAC. (a)** AC-TEM image **(b)** XRD pattern of the spent Cu-N<sub>4</sub> SAC was collected after 5 consecutive cycles at 150 °C. “\*” represents the characteristic peak of C<sub>3</sub>N<sub>4</sub>. Source data are provided as a Source Data file.

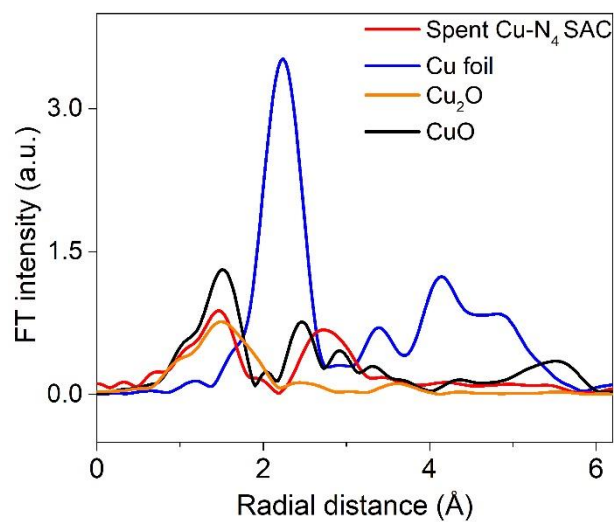

**Supplementary Figure 17 | Characterizations of the spent Cu-N<sub>4</sub> SAC.** EXAFS spectra were collected at Cu *K*-edge. Source data are provided as a Source Data file.

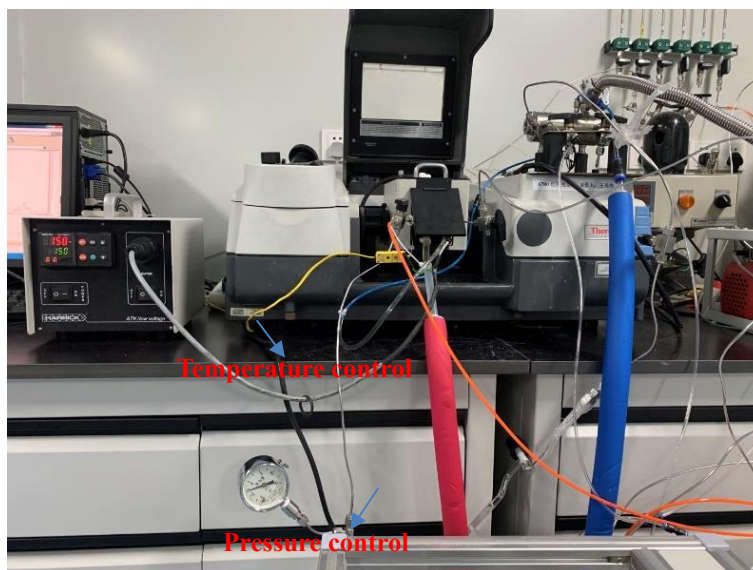

**Supplementary Figure 18 | Photograph of in-situ infrared spectrometer.** Note that the temperature and pressure can be regulated during test.

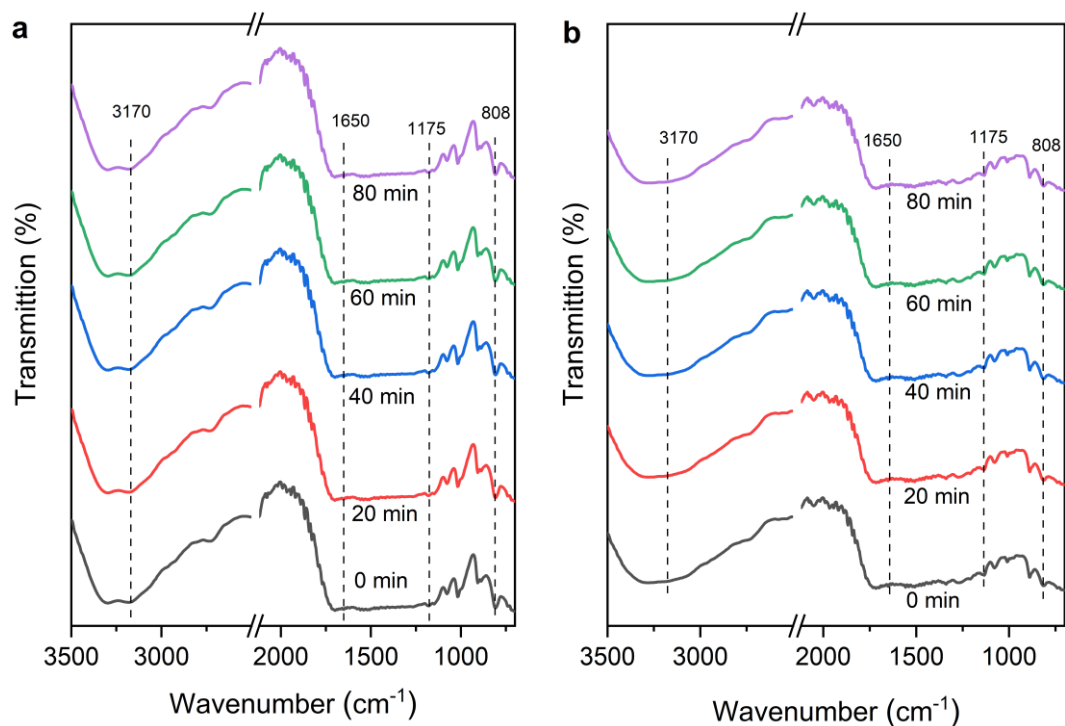

**Supplementary Figure 19 | In situ DRIFTS spectra of SACs for CO<sub>2</sub> hydrogenation.** In situ DRIFTS spectra of (a) Cu-N<sub>4</sub> and (b) Cu-N<sub>3</sub> SACs. The collected DRIFT spectra after exposing samples to the mixture of H<sub>2</sub>, CO<sub>2</sub> and N<sub>2</sub> (72:24:4 vol.%) at 3 MPa and 150 °C. Source data are provided as a Source Data file.

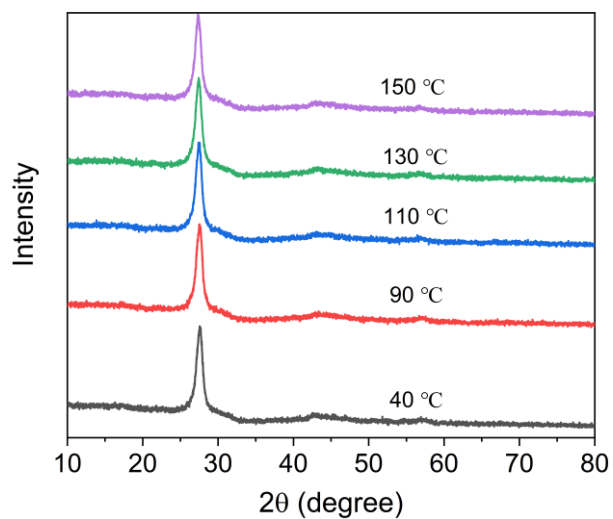

**Supplementary Figure 20 | In situ XRD pattern of Cu-N<sub>4</sub> SAC.** The experiment conducted at the mixture of H<sub>2</sub>, CO<sub>2</sub> and N<sub>2</sub> (72:24:4 vol.%) at 0.03 MPa and with different temperature. Source data are provided as a Source Data file.

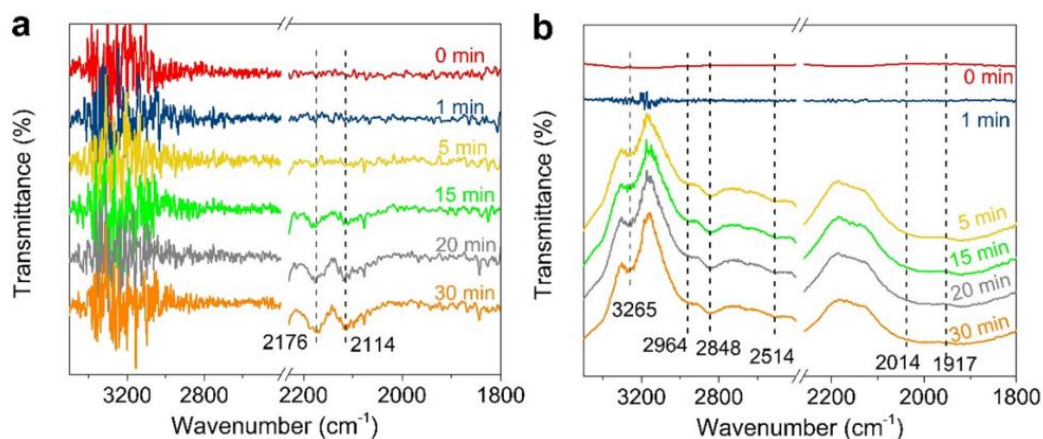

**Supplementary Figure 21 | *In situ* DRIFTS spectra of SACs for CO<sub>2</sub> hydrogenation.** *In situ* DRIFTS spectra of (a) Cu-N<sub>4</sub> and (b) Cu-N<sub>3</sub> SACs. The collected DRIFT spectra after exposing samples to the mixture of H<sub>2</sub>, CO<sub>2</sub> and N<sub>2</sub> (72:24:4 vol.%) at atmospheric pressure and 150 °C. Source data are provided as a Source Data file.

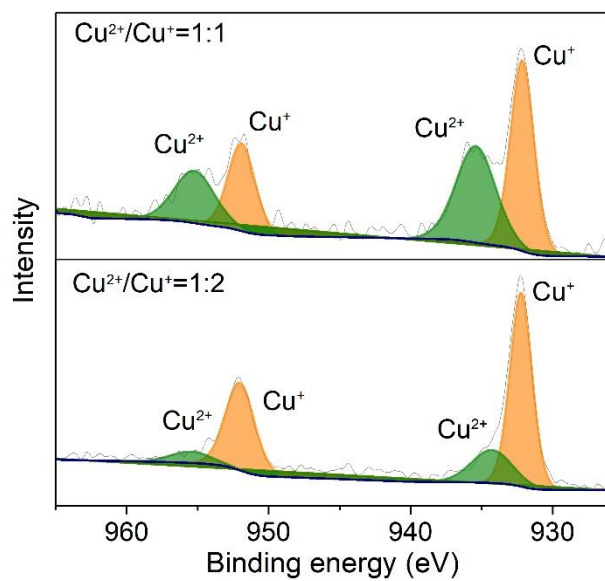

**Supplementary Figure 22 | Cu 2p XPS spectra of catalysts with different ratio of  $\text{Cu}^{2+}:\text{Cu}^+$ .** The variations of  $\text{Cu}^{2+}:\text{Cu}^+$  ratios were achieved by treating Cu-N<sub>3</sub> SAC at 500 °C in H<sub>2</sub> for different times (15 min for  $\text{Cu}^{2+}/\text{Cu}^+ = 1:1$  and 30 min for  $\text{Cu}^{2+}/\text{Cu}^+ = 1:2$ ). Source data are provided as a Source Data file.

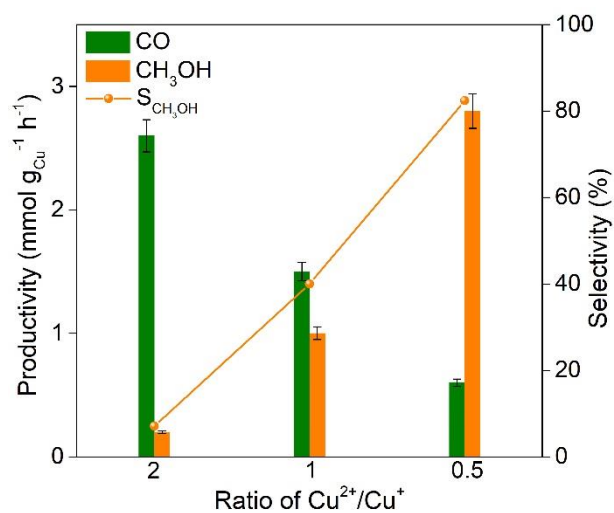

**Supplementary Figure 23 | CO<sub>2</sub> hydrogenation performance over Cu-based SACs with different Cu<sup>2+</sup>:Cu<sup>+</sup> ratios.** The reactor was pressurized with CO<sub>2</sub>, H<sub>2</sub> and N<sub>2</sub> with a total pressure of 3.2 MPa (72:24:4 vol.%). All the data were collected for three times, and the error bars represent the standard deviation. Source data are provided as a Source Data file.



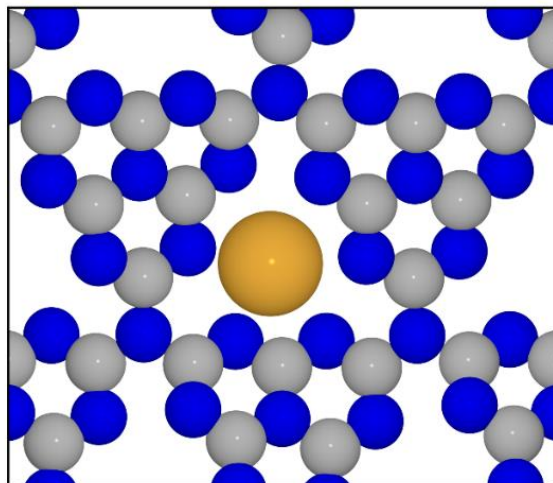

**Supplementary Figure 24 | Atomic configuration of Cu-N<sub>4</sub> SAC.** Cu single atom locates at the hole site of C<sub>3</sub>N<sub>4</sub>. Yellow: Cu atom, blue: N atoms, and grey: C atoms.

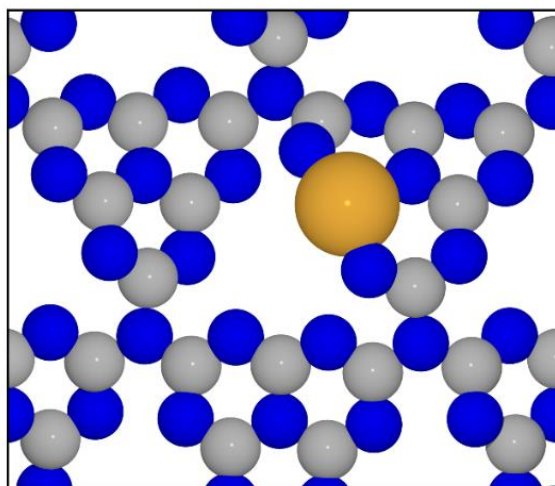

**Supplementary Figure 25 | Atomic configuration of Cu-N<sub>3</sub> SAC.** Cu atom replaces one of C atoms in C<sub>3</sub>N<sub>4</sub>. Yellow: Cu atom, blue: N atoms, and grey: C atoms.

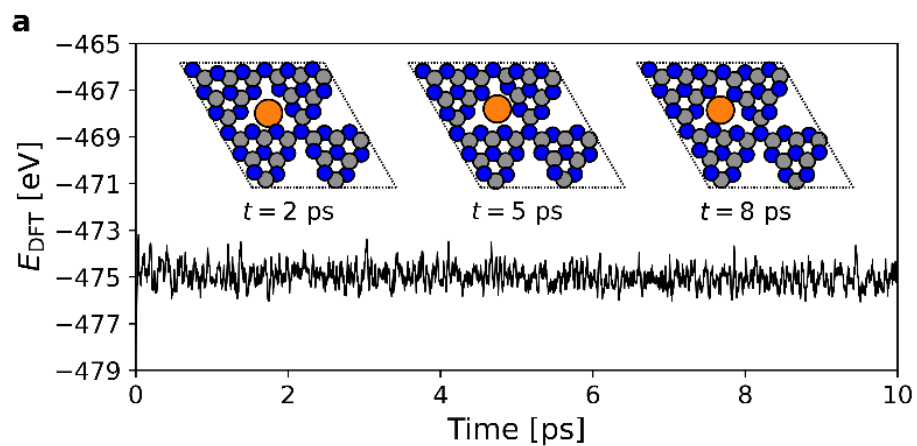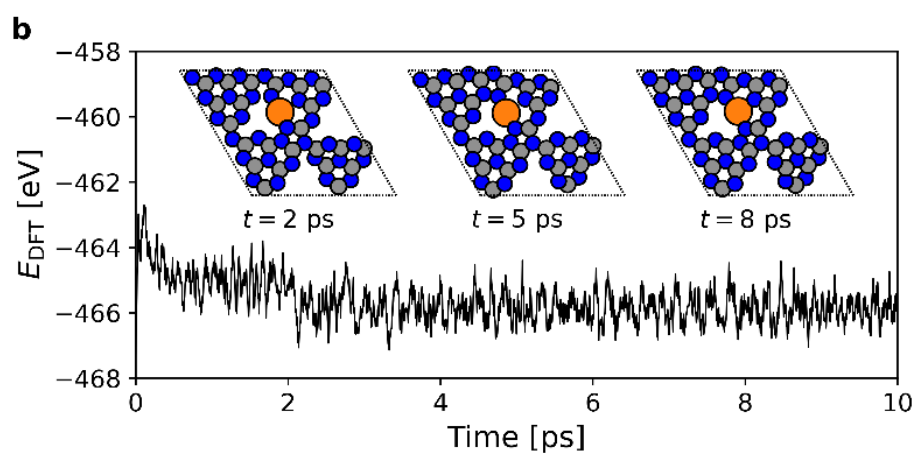

**Supplementary Figure 26 | The DFT total energies of (a) Cu-N<sub>4</sub> and (b) Cu-N<sub>3</sub> structures vs. total simulation time at 450 K. The inset shows the structures at 2ps, 5 ps and 8 ps.**

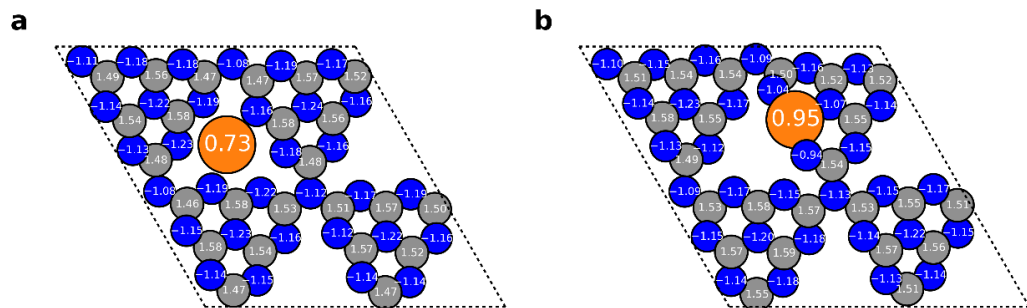

**Supplementary Figure 27 | Bader charge analysis for (a) Cu-N<sub>4</sub> and (b) Cu-N<sub>3</sub> SACs.** Yellow: Cu atom, blue: N atoms, and grey: C atoms.

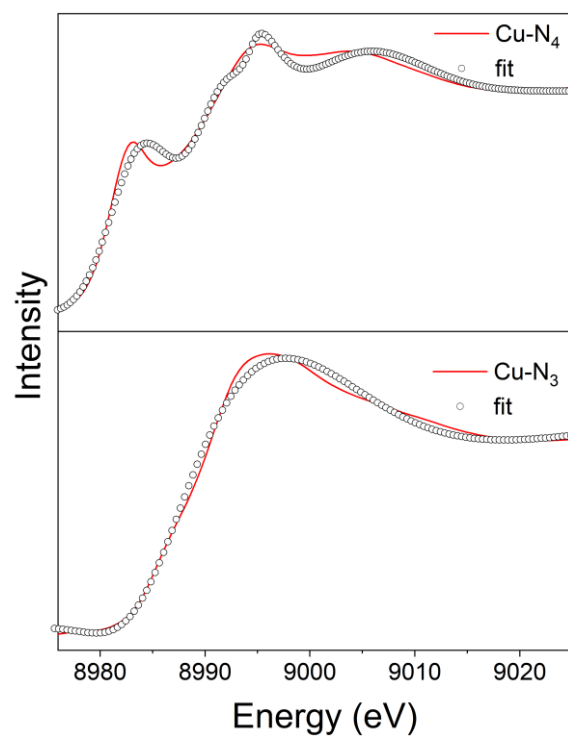

**Supplementary Figure 28 | Simulated XANES spectra based on the selected models for DFT calculations.** The structures of Cu-N<sub>4</sub> and Cu-N<sub>3</sub> are given in Supplementary Figures 24 and 25, respectively. Source data are provided as a Source Data file.

**Supplementary Table 1 | Physicochemical properties of various catalysts.**

| <b>Entry</b> | <b>Catalyst</b>                      | <b>Cu wt.%<sup>a</sup></b> |
|--------------|--------------------------------------|----------------------------|
| 1            | Cu-N <sub>4</sub>                    | 12.1                       |
| 2            | Cu-N <sub>3</sub>                    | 10.8                       |
| 3            | Cu NPs/C <sub>3</sub> N <sub>4</sub> | 12.2                       |

<sup>a</sup>: The compositions were determined by ICP-AES measurement.

**Supplementary Table 2 | EXAFS fitting of fresh SACs.**

| <b>Catalyst</b>       | <b>Path</b> | <b>N</b>  | <b>R (Å)</b> | <b><math>\sigma^2</math> (Å<sup>2</sup>)</b> | <b><math>\Delta E_0</math> (eV)</b> | <b>R factor</b> |
|-----------------------|-------------|-----------|--------------|----------------------------------------------|-------------------------------------|-----------------|
| Cu-N <sub>3</sub> SAC | Cu-N        | 3.1 ± 0.2 | 1.870        | 0.0068 ± 0.0006                              | 0.642±4.273                         | 0.008           |
| Cu-N <sub>4</sub> SAC | Cu-N        | 3.7 ± 0.4 | 1.896        | 0.0075 ± 0.0017                              | 2.1 ± 1.3                           | 0.008           |

**Supplementary Table 3 | Comparison between Cu-C<sub>3</sub>N<sub>4</sub> SACs and other reported catalysts for CO<sub>2</sub> hydrogenation**

| Catalyst                                     | T (°C)  | TOF (h <sup>-1</sup> ) | Selectivity                           | Ref.                                               |
|----------------------------------------------|---------|------------------------|---------------------------------------|----------------------------------------------------|
| Cu-N <sub>4</sub> SAC                        | 150     | 262.5                  | S <sub>CH<sub>3</sub>OH</sub> = 95.5% | This work                                          |
| Cu-N <sub>3</sub> SAC                        | 150     | 156.3                  | S <sub>CO</sub> = 94.3%               | This work                                          |
| Cu/Mo <sub>2</sub> C                         | 135     | 1.7                    | S <sub>CH<sub>3</sub>OH</sub> = 93%   | <i>J. Catal.</i> <b>2016</b> , 343, 147            |
| Pt/Co <sub>3</sub> O <sub>4</sub>            | 140     | —                      | S <sub>C<sub>2</sub>+OH</sub> = 82.5% | <i>Angew. Chem. Int. Ed.</i> <b>2016</b> , 55, 737 |
| Rh <sub>75</sub> W <sub>25</sub>             | 150     | 592                    | S <sub>CH<sub>3</sub>OH</sub> = 97%   | <i>Nano Lett.</i> <b>2017</b> , 17, 788            |
| Pt <sub>4</sub> Co NWs/C                     | 210     | 1418                   | —                                     | <i>Small</i> <b>2017</b> , 13, 1604311             |
| Pt(3)/MoO <sub>x</sub> (30)/TiO <sub>2</sub> | 150     | —                      | S <sub>CH<sub>3</sub>OH</sub> = 94.3% | <i>ACS Catal.</i> <b>2019</b> , 9, 8187            |
| Pt <sub>1</sub> @MIL                         | 150     | 117                    | S <sub>CH<sub>3</sub>OH</sub> = 90.3% | <i>Nat. Commun.</i> <b>2019</b> , 10, 1885         |
| UiO-67-Pt                                    | 170-190 | —                      | S <sub>CH<sub>3</sub>OH</sub> = 42%   | <i>J. Am. Chem. Soc.</i> <b>2020</b> , 142, 17105  |
| FL-MoS <sub>2</sub>                          | 180     | —                      | S <sub>CH<sub>3</sub>OH</sub> = 94.3% | <i>Nat. Catal.</i> <b>2021</b> , 4, 242            |



**Supplementary Table 4 | Free energy corrections ( $T = 423$  K,  $p = 101325$  Pa) for gas-phase species (in eV).**

| <b>Species</b>     | <b><math>E_{\text{DFT}}</math></b> | <b><math>E_{\text{ZPE}}</math></b> | <b><math>TS</math></b> | <b>Correction</b> | <b><math>G</math></b> |
|--------------------|------------------------------------|------------------------------------|------------------------|-------------------|-----------------------|
| H <sub>2</sub> O   | -14.220                            | 0.568                              | 0.881                  | 0.000             | -14.532               |
| H <sub>2</sub>     | -6.771                             | 0.269                              | 0.617                  | 0.000             | -7.119                |
| CO <sub>2</sub>    | -22.957                            | 0.307                              | 1.002                  | 0.111             | -23.541               |
| CO                 | -14.776                            | 0.132                              | 0.912                  | -0.343            | -15.900               |
| CH <sub>3</sub> OH | -30.226                            | 1.354                              | 1.127                  | 0.000             | -29.998               |

**Supplementary Table 5 | Analysis of reaction enthalpies (in eV) of gas-phase thermochemical reactions.**  $\Delta H_{\text{ref}}$  values were taken from NIST,  $\Delta H_{\text{unc}}$  values were calculated from PBE functional,  $\Delta H_{\text{cor}}$  values were the correction values for reaction enthalpies.

| Stoichiometry                                                                           | $\Delta H_{\text{ref}}$ | $\Delta H_{\text{unc}}$ | Error <sub>unc</sub> | Correction | $\Delta H_{\text{cor}}$ | Error <sub>cor</sub> |
|-----------------------------------------------------------------------------------------|-------------------------|-------------------------|----------------------|------------|-------------------------|----------------------|
| $\text{CO}_2 + \text{H}_2 \rightarrow \text{CO} + \text{H}_2\text{O}$                   | 0.427                   | 0.861                   | -0.434               | -0.454     | 0.407                   | 0.019                |
| $\text{CO}_2 + 4\text{H}_2 \rightarrow 2\text{H}_2\text{O} + \text{CH}_4$               | -1.707                  | -1.649                  | -0.058               | -0.111     | -1.759                  | 0.052                |
| $3\text{H}_2 + \text{CO} \rightarrow \text{H}_2\text{O} + \text{CH}_4$                  | -2.134                  | -2.510                  | 0.376                | 0.343      | -2.167                  | 0.033                |
| $\text{CO}_2 + \text{H}_2 \rightarrow \text{HCOOH}$                                     | 0.152                   | 0.075                   | 0.077                | 0.000      | 0.075                   | 0.077                |
| $\text{CO} + \text{H}_2\text{O} \rightarrow \text{HCOOH}$                               | -0.274                  | -0.786                  | 0.511                | 0.454      | -0.332                  | 0.058                |
| $\text{CO}_2 + 3\text{H}_2 \rightarrow \text{H}_2\text{O} + \text{CH}_3\text{OH}$       | -0.511                  | -0.513                  | 0.002                | -0.111     | -0.624                  | 0.113                |
| $2\text{H}_2 + \text{CO} \rightarrow \text{CH}_3\text{OH}$                              | -0.938                  | -1.374                  | 0.437                | 0.343      | -1.031                  | 0.094                |
| $\text{CO}_2 + 3\text{H}_2 \rightarrow 2\text{H}_2\text{O} + 1/2\text{C}_2\text{H}_4$   | -0.662                  | -0.572                  | -0.091               | -0.111     | -0.682                  | 0.020                |
| $2\text{H}_2 + \text{CO} \rightarrow \text{H}_2\text{O} + 1/2\text{C}_2\text{H}_4$      | -1.089                  | -1.433                  | 0.344                | 0.343      | -1.090                  | 0.001                |
| $\text{CO}_2 + 7/2\text{H}_2 \rightarrow 2\text{H}_2\text{O} + 1/2\text{C}_2\text{H}_6$ | -1.369                  | -1.318                  | -0.051               | -0.111     | -1.428                  | 0.059                |
| $5/2\text{H}_2 + \text{CO} \rightarrow \text{H}_2\text{O} + 1/2\text{C}_2\text{H}_6$    | -1.796                  | -2.179                  | 0.383                | 0.343      | -1.836                  | 0.040                |
